# Supplementary material for: The Zinc Finger Protein Mig1 Regulates Mitochondrial Function and Azole Drug Susceptibility in the Pathogenic Fungus Cryptococcus neoformans
Source: PubMed Central journal article supplement (PMC4863601; doi:10.1128/msphere.00080-15), 2016-01-13
Supplement: sph001160060st1.pdf [file sph001160060st1.pdf]

Table 1: Primer used in this study

| <b>Primers used for mutagenesis</b>                 |                                                            |
|-----------------------------------------------------|------------------------------------------------------------|
| <i>mig1</i> Δ:: <i>NEO</i> deletion construct       |                                                            |
| MIG1-9PO                                            | GGACAGCTCGCAAGTTCTTA                                       |
| MIG1-Neo-2                                          | CTGCAGATATCCATCACACTGGCGGCGATGGGATTTTGAGGG<br>GAGGAGGATG   |
| MIG1-Neo-3                                          | CATCCTCCTCCCCTCAAATCCCATCGCCGCCAGTGTGATGG<br>ATATCTGCAG    |
| MIG1-Neo-4                                          | CTACGGATGTCCATCCAGCTCCATGCCGCCAGTGTGCTGGAA<br>TTCGCCCTTGG  |
| MIG1-Neo-5                                          | ACCAAGGGCGAATTCCAGCACACTGGCGGCATGGAGCTGGA<br>TGGACATCCGTAG |
| MIG1-6 R                                            | ATCGGTCTTACCCCTTCTGCAACAGCA                                |
| <i>MIG1</i> :: <i>NEO</i> complementation construct |                                                            |
| MIG1-CP1                                            | GAGAGGACAGCTCGCAAGTTCTTAAG                                 |
| MIG1-CP2                                            | GCAGATATCCATCACACTGGCGGCGTCCTTCTCATCAAATAC<br>GACTCCTCTC   |
| MIG1-CP3                                            | GAGAGGAGTCGTATTTGATGAGAAGGACGCCGCCAGTGTGAT                 |

|                                 |                                                           |
|---------------------------------|-----------------------------------------------------------|
|                                 | GGATATCTGC                                                |
| MIG1-CP4                        | TGACAAGAGTAACGACGAGACATCTCTAAGTGTGCTGGAATT<br>CGCCCTTGGT  |
| MIG1-CP5                        | ACCAAGGGCGAATTCCAGCACACTTAGAGATGTCTCGTCGTT<br>ACTCTTGTC A |
| MIG1-CP6                        | CTAGGTTGTCTCAGTAGTCGTTGTTAATG                             |
| <b>Primers used for qRT-PCR</b> |                                                           |
| QRT-MIG F                       | GTCCTCTATGTGATCGGGCGTTCTACAGGC                            |
| QRT-MIG R                       | TGGCATGTCTTGTC AATTCGTCGGAACGTG                           |
| HAPX-F1                         | TCGCACCTCTTCAGATGCTTT                                     |
| HAPX-R1                         | CGAGAACCGCCACACA ACT                                      |
| Q1721-1F                        | TGCTGCCCATCCCGAAT                                         |
| Q1721-2R                        | CCTGGCCCCTGAAAGGA                                         |
| CIG1-RT-F                       | GGTGGTCCGGTTTCCTTCA                                       |
| CIG1-RT-R                       | GACTCGTGGTCGTGCATAACA                                     |
| Q1137-F                         | CCGTATCCACGAGACCAACT                                      |
| Q1137-R                         | ATCATGTTGAGGGCAGAACC                                      |
| Q7908-F                         | AAGGCTAGGGAAGAGCCTTG                                      |

|          |                         |
|----------|-------------------------|
| Q7908-R  | GCTTCTTGAGGTTGGTCTCG    |
| Q3427-F  | ACATCTGTTACACCGACCA     |
| Q3427-R  | CAGGCTTCCAGAAAGCAATC    |
| HEM4-F1  | CGGGCCATACCTGTTCTTGT    |
| HEM4-R1  | GCGCGGTAGGCATCTCAT      |
| Q2565-F  | CGGTTCTTTCGGTGACATTT    |
| Q2565-R  | GTCTTCTCCCCTTCCTCACC    |
| LEU1-F   | CGGTATGCTTCCTCTTCAGC    |
| LEU1-R   | TCGGTGGACAAGGGTAAGAC    |
| MIRB-F1  | GCTCAGCGAGGTGTGCAA      |
| MIRB-R1  | CGACATTCTCGACCAAGTCAA   |
| 18S-RT-F | AACAGGTCTGTGATGCCCTTAGA |
| 18S-RT-R | ACTCGCTGGCTCAGTCAGTGT   |
