# Supplementary material for: The Zinc Finger Protein Mig1 Regulates Mitochondrial Function and Azole Drug Susceptibility in the Pathogenic Fungus Cryptococcus neoformans
Source: PubMed Central journal article supplement (PMC4863601; doi:10.1128/msphere.00080-15), 2016-01-13
Supplement: sph001160060st2.pdf [file sph001160060st2.pdf]

**Supplemental Table 2:** Classified significant genes differently expressed in a *mig1Δ* mutant compared to the WT strain H99 (*mig1Δ*/WT) when grown in low iron media and high iron media.

| CATEGORIES               | DESCRIPTION                                              | Fold change in low iron | Fold change in high iron | P value  |
|--------------------------|----------------------------------------------------------|-------------------------|--------------------------|----------|
| <b><u>METABOLISM</u></b> |                                                          |                         |                          |          |
| <b>Nucleotides</b>       |                                                          |                         |                          |          |
| CNAG_02294               | Phosphoribosylaminoimidazole carboxylase ( <i>ADE2</i> ) | 1.18                    |                          | 4.72E-08 |
| CNAG_06694               | Hydroxyisourate hydrolase ( <i>URO2</i> )                | 1.18                    |                          | 2.09E-07 |
| CNAG_02795               | Phosphoribosylglycinamide formyltransferase              | 1.22                    |                          | 4.62E-06 |
| CNAG_04192               | Phosphoribosylformylglycinamide synthase                 | 1.23                    |                          | 1.68E-08 |
| CNAG_06371               | Guanine deaminase                                        | 1.21                    |                          | 2.88E-06 |
| CNAG_03973               | Hydantoinase                                             | 1.20                    |                          | 2.38E-07 |
| CNAG_01915               | Ribonucleoside-diphosphate reductase subunit M2          | 1.22                    |                          | 8.53E-09 |
| CNAG_06708               | dCMP deaminase                                           |                         | -1.09                    | 3.29E-07 |
| <b>Amino acids</b>       |                                                          |                         |                          |          |
| CNAG_03701               | 3-phosphoshikimate 1-carboxyvinyltransferase             | 1.24                    |                          | 4.97E-07 |
| CNAG_02270               | Homoserine O-acetyltransferase ( <i>MET2</i> )           | 1.24                    |                          | 6.72E-10 |
| CNAG_04215               | Sulfate adenylyltransferase ( <i>MET3</i> )              | 1.27                    |                          | 7.83E-08 |
| CNAG_03168               | Sulfite reductase (NADPH) flavoprotein alpha-component   | 1.29                    |                          | 5.27E-07 |
| CNAG_02202               | Adenylyl-sulfate kinase homologue of <i>MET14</i>        | 1.13                    |                          | 8.35E-08 |
| CNAG_04776               | Homoserine dehydrogenase ( <i>HOM6</i> )                 | 1.14                    |                          | 2.54E-07 |
| CNAG_01609               | Cystathionine gamma-synthase                             | 1.15                    |                          | 1.55E-06 |
| CNAG_00237               | 3-isopropylmalate dehydratase ( <i>LEU1</i> )            | 1.23                    |                          | 4.44E-12 |
| CNAG_00743               | Imidazoleglycerol phosphate synthase. cyclase subunit    | 1.14                    |                          | 6.95E-08 |
| CNAG_06830               | Histidinol dehydrogenase                                 | 1.16                    |                          | 5.71E-06 |
| CNAG_01997               | Prephenate dehydrogenase                                 | 1.09                    |                          | 2.70E-07 |
| CNAG_01952               | aryl-alcohol dehydrogenase                               | 1.11                    |                          | 4.02E-06 |
| CNAG_05070               | Sulfite reductase (NADPH) hemoprotein. beta-component    | 1.36                    |                          | 1.10E-09 |
| CNAG_01252               | Iosulfate/3-mercaptopyruvate sulfurtransferase           | 1.16                    |                          | 2.17E-08 |

|                      |                                                                           |       |          |
|----------------------|---------------------------------------------------------------------------|-------|----------|
| CNAG_05398           | Phosphoserine transaminase                                                | 1.14  | 1.37E-06 |
| CNAG_03588           | L- amino adipate-semialdehyde dehydrogenase ( <i>LYS2</i> )               | 1.24  | 7.39E-08 |
| CNAG_03720           | D-tyrosyl-tRNA(Tyr) deacylase                                             | 1.16  | 1.62E-08 |
| CNAG_03854           | Lysine decarboxylase                                                      | -1.29 | 8.52E-11 |
| CNAG_03812           | Histidinol-phosphate transaminase                                         | 1.08  | 7.16E-06 |
| CNAG_03280           | Dihydrodipicolinate synthetase                                            | 1.27  | 1.19E-06 |
| CNAG_05496           | 2-isopropylmalate synthase                                                | 1.16  | 4.04E-08 |
| CNAG_07802           | Class III aminotransferase                                                | -1.14 | 1.78E-10 |
| <b>Carbohydrates</b> |                                                                           |       |          |
| CNAG_01776           | 2,4-dihydroxyhept-2-ene-1,7-dioic acid aldolase                           | 1.15  | 2.08E-08 |
| CNAG_06923           | Xylulose 5-phosphate/fructose 6-phosphate phosphoketolase ( <i>XFP2</i> ) | 1.22  | 4.79E-07 |
| CNAG_05369           | Beta-glucosidase                                                          | 1.17  | 4.91E-07 |
| CNAG_06659           | Beta-hexosaminidase ( <i>HEX1</i> )                                       | 1.14  | 4.25E-06 |
| CNAG_04095           | Alpha-L-rhamnosidase                                                      | 1.13  | 2.42E-07 |
| CNAG_04373           | Alginate lyase                                                            | 1.08  | 3.57E-09 |
| CNAG_02552           | Transketolase                                                             | -1.33 | 2.09E-06 |
| CNAG_03096           | UDP-glucose 4-epimerase                                                   | -1.17 | 8.11E-08 |
| CNAG_03946           | Galactokinase                                                             | -1.34 | 2.52E-11 |
| CNAG_06260           | Alpha-glucosidase involved in maltose catabolism                          | -1.31 | 2.71E-06 |
| CNAG_04673           | NAD dependent epimerase/dehydratase                                       | -1.11 | 6.06E-06 |
| CNAG_04122           | Galactose dehydrogenase                                                   | 1.15  | 2.09E-06 |
| CNAG_06692           | Glucosamine-phosphate N-acetyltransferase                                 | -1.20 | 1.82E-08 |
| CNAG_04523           | Glyceraldehyde-3-phosphate dehydrogenase, type I                          | -1.24 | 1.23E-10 |
| <b>Fatty acid</b>    |                                                                           |       |          |
| CNAG_02449           | Long-chain fatty acid CoA ligase                                          | 1.09  | 3.34E-06 |
| CNAG_01044           | Dihydroceramidase                                                         | 1.20  | 1.33E-07 |
| CNAG_01116           | Beta-ketoacyl reductase                                                   | 1.09  | 4.16E-06 |
| CNAG_02935           | Malonic semialdehyde reductase                                            | 1.16  | 2.98E-08 |
| CNAG_06783           | Enoyl reductase                                                           | 1.23  | 1.04E-10 |
| CNAG_03623           | Malonic semialdehyde reductase                                            | -1.16 | 2.57E-06 |
| CNAG_04652           | Enoyl reductase                                                           | -1.25 | 1.21E-06 |
| <b>Ergosterol</b>    |                                                                           |       |          |
| CNAG_01737           | C-4 methyl sterol oxidase ( <i>ERG25</i> )                                | 1.15  | 2.60E-07 |
| CNAG_02830           | Delta24(24-1) sterol reductase ( <i>ERG4</i> )                            | 1.18  | 6.64E-06 |
| CNAG_01771           | Related to cytochrome P450 regulator Dap1                                 | 1.14  | 1.74E-07 |
| <b>Folic acid</b>    |                                                                           |       |          |
| CNAG_02870           | Folypolyglutamate synthetase ( <i>MET7</i> )                              | 1.22  | 5.58E-06 |
| CNAG_04010           | GTP cyclohydrolase I ( <i>FOL2</i> )                                      | 1.13  | 1.44E-07 |
| CNAG_00760           | Methylenetetrahydrofolate reductase (NADPH)                               | 1.17  | 3.60E-07 |
| CNAG_07796           | Uroporphyrin-III C-methyltransferase                                      | 1.19  | 2.71E-07 |

|                                      |                                                              |       |                |
|--------------------------------------|--------------------------------------------------------------|-------|----------------|
| <b>Co-enzyme A</b>                   |                                                              |       |                |
| CNAG_03738                           | Pantetheine-phosphate adenylyltransferase                    | 1.15  | 4.00E-07       |
| <b>Biotin</b>                        |                                                              |       |                |
| CNAG_00236                           | 8-Amino-7-oxononanoate synthase                              | 1.23  | 9.61E-08       |
| <b>Heme</b>                          |                                                              |       |                |
| CNAG_01721                           | Porphobilinogen deaminase ( <i>HEM3</i> )                    | 1.08  | 3.04E-06       |
| CNAG_02460                           | Coproporphyrinogen-III oxidase ( <i>HEM13</i> )              | 1.20  | 2.83E-11       |
| <b>Flavonoid</b>                     |                                                              |       |                |
| CNAG_03340                           | Flavonol synthase                                            | 1.18  | 1.49E-06       |
| CNAG_02181                           | Dihydrokaempferol 4-reductase                                | -1.16 | 5.13E-07       |
| <b><u>TRANSPORT</u></b>              |                                                              |       |                |
| <b>Amino acid transporters</b>       |                                                              |       |                |
| CNAG_02539                           | AAT family amino acid transporter                            | 1.11  | 1.57E-06       |
| CNAG_01074                           | Neutral amino acid transporter                               | 1.13  | 2.14E-07       |
| CNAG_00597                           | Amino acid transporter ( <i>DIP5</i> )                       | -1.48 | 5.61E-09       |
| CNAG_03988                           | Solute carrier family 38. member 11                          |       | -1.14 3.12E-07 |
| <b>Carbohydrate transporters</b>     |                                                              |       |                |
| CNAG_02479                           | Monosaccharide transporter                                   | 1.19  | 5.86E-09       |
| CNAG_01683                           | Monosaccharide transporter ( <i>STL1</i> )                   | -1.31 | 7.79E-08       |
| CNAG_04210                           | Sugar transporter. probable maltose permease ( <i>MALP</i> ) | -1.47 | 2.14E-08       |
| CNAG_06290                           | high-affinity glucose transporter ( <i>SNF3</i> )            | -1.29 | 2.82E-06       |
| CNAG_03426                           | GDP-mannose transporter ( <i>GMT2</i> )                      |       | 1.25 1.12E-06  |
| CNAG_02586                           | Sugar transporter                                            |       | -1.16 1.74E-06 |
| <b>Organic compound transporters</b> |                                                              |       |                |
| CNAG_05851                           | Glycerol transporter                                         | 1.13  | 2.21E-07       |
| CNAG_04794                           | Spermine transporter                                         | 1.11  | 6.03E-06       |
| CNAG_04818                           | Related to monocarboxylate transporter                       | 1.19  | 3.79E-08       |
| CNAG_04038                           | MFS quinate transporter ( <i>QUTD</i> )                      | -1.17 | 3.29E-06       |
| CNAG_04142                           | Tartrate transporter                                         | -1.32 | 1.10E-07       |
| CNAG_03051                           | Polyamine transporter                                        | -1.25 | 8.46E-08       |
| CNAG_05993                           | Transmembrane transporter ( <i>LIZ1</i> )                    | -1.32 | 8.63E-09       |
| CNAG_05667                           | Myo-inositol transporter ( <i>ITR3B</i> )                    |       | -1.11 4.61E-06 |
| CNAG_04536                           | Nicotinamide mononucleotide permease                         |       | -1.38 1.16E-09 |
| <b>Ion transporters</b>              |                                                              |       |                |
| CNAG_02221                           | Zinc ion transporter ( <i>ZIP3</i> )                         | 1.08  | 8.99E-07       |
| CNAG_02806                           | Solute carrier family 30 (zinc transporter). member 1        | 1.16  | 1.01E-06       |
| CNAG_05135                           | Calcium-transporting ATPase ( <i>PMR1</i> )                  | 1.14  | 6.90E-06       |
| CNAG_01318                           | Sodium / hydrogen exchanger 3                                | 1.15  | 4.47E-08       |
| CNAG_02856                           | Potassium transport protein                                  | 1.26  | 9.31E-10       |

|                                   |                                                                                       |       |          |
|-----------------------------------|---------------------------------------------------------------------------------------|-------|----------|
| CNAG_02440                        | Cation-transporting ATPase                                                            | -1.35 | 2.12E-08 |
| CNAG_04337                        | Cation diffusion facilitator                                                          | -1.10 | 1.44E-06 |
| <b>Nuclear transport proteins</b> |                                                                                       |       |          |
| CNAG_04149                        | Nuclear pore complex protein Nup107                                                   | 1.12  | 2.85E-06 |
| CNAG_02203                        | Karyopherin/importin                                                                  | 1.25  | 5.66E-09 |
| CNAG_06545                        | Pim1 protein + RNA transporter 2                                                      | 1.15  | 7.63E-08 |
| <b>Intracellular trafficking</b>  |                                                                                       |       |          |
| CNAG_04684                        | Putative GTPase-activating protein ( <i>SEC23</i> )                                   | 1.09  | 4.50E-06 |
| CNAG_01720                        | Escrt-I complex protein ( <i>VPS23</i> )                                              | 1.16  | 1.56E-06 |
| CNAG_00582                        | Vacuolar transporter chaperone 1 ( <i>VTC1</i> )                                      | 1.13  | 1.91E-07 |
| CNAG_01263                        | Vacuolar transporter chaperone 4 ( <i>VTC4</i> )                                      | 1.11  | 4.94E-06 |
| CNAG_01759                        | Vacuolar membrane transport protein                                                   | 1.20  | 1.00E-08 |
| CNAG_01552                        | Blocked early in transport 1 ( <i>BET1</i> )                                          | 1.21  | 1.10E-07 |
| CNAG_00469                        | Endoplasmic reticulum protein may be involved in COP II vesicle transport             | 1.12  | 3.13E-07 |
| <b>Other transporters</b>         |                                                                                       |       |          |
| CNAG_00796                        | Putative ABC multidrug resistance transporter with similarity to Ste6 ( <i>MDR1</i> ) | 1.16  | 1.22E-06 |
| CNAG_00749                        | Alternative sulfate transporter                                                       | 1.45  | 4.64E-09 |
| CNAG_03524                        | Uncharacterized transmembrane receptor                                                | 1.29  | 9.31E-10 |
| CNAG_03909                        | Putative transporter                                                                  | 1.17  | 3.36E-10 |
| CNAG_01119                        | POT family proton-dependent oligopeptide transporter                                  | -1.29 | 3.34E-06 |
| CNAG_00905                        | MFS transporter                                                                       | -1.46 | 1.40E-07 |
| CNAG_01690                        | MFS transporter                                                                       | -1.47 | 4.41E-11 |
| CNAG_01960                        | Efflux protein EncT                                                                   | -1.23 | 3.39E-07 |
| CNAG_06758                        | Efflux protein                                                                        | -1.42 | 9.66E-11 |
| <b><u>CELL SIGNALLING</u></b>     |                                                                                       |       |          |
| CNAG_00179                        | Heterotrimeric G-protein coupled receptor alpha subunit ( <i>GPA2</i> )               | 1.24  | 5.19E-07 |
| CNAG_02090                        | Heterotrimeric G-protein coupled receptor alpha subunit ( <i>GPA3</i> )               | 1.27  | 5.61E-07 |
| CNAG_01909                        | Signal transducer                                                                     | 1.21  | 5.82E-07 |
| CNAG_03024                        | AGC protein kinase                                                                    | 1.16  | 5.18E-06 |
| CNAG_06301                        | AGC family protein kinase ( <i>SCH9</i> )                                             | 1.17  | 2.18E-07 |
| CNAG_03202                        | Adenylate cyclase ( <i>CAC1</i> )                                                     | 1.21  | 1.37E-10 |
| CNAG_04162                        | Protein kinase A catalytic subunit ( <i>PKA2</i> )                                    | 1.16  | 1.13E-06 |
| CNAG_05155                        | Protein tyrosine phosphatase ( <i>PTP2</i> )                                          | 1.16  | 3.23E-06 |
| CNAG_02446                        | Response regulator receiver protein                                                   | 1.16  | 7.29E-08 |
| CNAG_03500                        | Osmosensor                                                                            | 1.25  | 5.54E-09 |
| CNAG_04574                        | Dolichyl-phosphate mannosyltransferase polypeptide                                    | 1.13  | 8.15E-07 |

|                                 |                                                       |       |                |
|---------------------------------|-------------------------------------------------------|-------|----------------|
|                                 | 2 ( <i>DMP2</i> )                                     |       |                |
| CNAG_01889                      | Glutathione S-transferase                             | -1.17 | 4.33E-06       |
| CNAG_05998                      | Rho-GTPase ( <i>RAC2</i> )                            | -1.18 | 1.46E-06       |
| CNAG_00752                      | Transducin family protein                             | -1.36 | 2.97E-06       |
| <b><u>CELLULAR DIVISION</u></b> |                                                       |       |                |
| <b>DNA replication</b>          |                                                       |       |                |
| CNAG_03203                      | DNA polymerase epsilon p12 subunit                    | 1.09  | 3.30E-06       |
| CNAG_04703                      | DNA clamp loader                                      | 1.15  | 3.04E-09       |
| CNAG_07686                      | Topoisomerase 1-associated factor 1                   | 1.14  | 3.83E-06       |
| CNAG_00665                      | DNA topoisomerase 2-associated protein PAT1           | 1.21  | 9.71E-07       |
| CNAG_06744                      | Chromatin structure-remodeling complex subunit RSC9   | 1.11  | 3.05E-06       |
| CNAG_05096                      | Histone deacetylase 1/2                               | 1.20  | 1.29E-07       |
| CNAG_05276                      | Histone deacetylase 1/2                               |       | 1.08 2.34E-07  |
| CNAG_03956                      | Replication factor C subunit 3/5                      |       | -1.11 1.04E-06 |
| <b>DNA repair</b>               |                                                       |       |                |
| CNAG_00076                      | A/G-specific adenine glycosylase                      | 1.18  | 5.21E-07       |
| CNAG_05201                      | DNA mismatch repair protein MSH4                      | 1.13  | 1.06E-06       |
| CNAG_00572                      | DNA excision repair protein ERCC-2                    | 1.10  | 2.71E-06       |
| CNAG_00445                      | nonhistone chromosomal protein ( <i>NHP6B01</i> )     | 1.24  | 3.63E-09       |
| CNAG_00395                      | Structure-specific endonuclease subunit SLX1          | -1.14 | 2.54E-06       |
| CNAG_01163                      | DNA repair and recombination protein ( <i>RAD54</i> ) | -1.24 | 5.86E-07       |
| CNAG_02115                      | nonhistone chromosomal protein ( <i>NHP6B02</i> )     |       | 1.10 1.62E-06  |
| CNAG_03213                      | UV DNA damage endonuclease ( <i>UVE1</i> )            |       | 1.23 8.50E-08  |
| <b>Cell cycle</b>               |                                                       |       |                |
| CNAG_01023                      | Cohesin complex subunit SCC1                          | 1.32  | 1.70E-10       |
| CNAG_03767                      | Cohesin complex subunit PSM1                          | 1.20  | 2.26E-08       |
| CNAG_01959                      | Condensin complex subunit 1                           | 1.17  | 1.39E-06       |
| CNAG_04648                      | Sister chromatid cohesion protein PDS5                | 1.17  | 7.74E-08       |
| CNAG_03148                      | Nuclear condensin complex protein                     | 1.18  | 2.45E-06       |
| CNAG_05752                      | Kinesin microtubule motor protein ( <i>KAR3</i> )     | 1.16  | 1.17E-08       |
| CNAG_03453                      | kinesin-like protein ( <i>KIP1</i> )                  | 1.20  | 1.77E-08       |
| CNAG_02721                      | Leucine repeat containing protein                     | 1.24  | 6.07E-07       |
| CNAG_00320                      | Anaphase-promoting complex subunit 3                  | 1.20  | 3.67E-06       |
| CNAG_07909                      | Meiotic recombinase Dmc1                              | 1.15  | 5.16E-08       |
| CNAG_02095                      | Cyclin                                                | 1.25  | 5.26E-09       |
| CNAG_01572                      | Tyrosine phosphatase                                  | 1.31  | 1.20E-10       |
| CNAG_00683                      | CMGC/CLK protein kinase                               | 1.21  | 1.20E-06       |
| CNAG_02051                      | Kinesin family member 20/23                           |       | 1.15 8.17E-08  |
| CNAG_05781                      | Dynein light chain LC8-type                           |       | -1.15 2.03E-07 |

|                               |                                                                                    |       |          |
|-------------------------------|------------------------------------------------------------------------------------|-------|----------|
| CNAG_02186                    | Myosin regulatory light chain                                                      | -1.11 | 7.90E-07 |
| <b>Mating</b>                 |                                                                                    |       |          |
| CNAG_03938                    | Nonmating-type specific pheromone G-protein coupled receptor ( <i>CPR2</i> )       | 1.13  | 3.29E-11 |
| CNAG_01234                    | Spore wall assembly-associated protein                                             | 1.23  | 2.30E-09 |
| CNAG_06808                    | a-factor pheromone receptor ( <i>STE3alpha</i> )                                   | -1.12 | 1.02E-08 |
| <b><u>GENE EXPRESSION</u></b> |                                                                                    |       |          |
| <b>Ribosome</b>               |                                                                                    |       |          |
| CNAG_03762                    | AdoMet-dependent rRNA methyltransferase SPB1                                       | 1.13  | 5.82E-06 |
| CNAG_01455                    | Large subunit ribosomal protein L39 ( <i>RPL39alpha</i> )                          | 1.13  | 1.28E-07 |
| CNAG_01590                    | Large subunit ribosomal protein L32                                                | 1.19  | 2.33E-06 |
| CNAG_03693                    | Large subunit ribosomal protein L11                                                | 1.15  | 4.25E-06 |
| CNAG_05764                    | Small subunit ribosomal protein S5                                                 | 1.19  | 3.18E-07 |
| CNAG_05976                    | Nucleolar protein 58                                                               | -1.36 | 4.58E-06 |
| CNAG_01791                    | Ribosome production factor 1                                                       | -1.27 | 3.48E-06 |
| <b>Transcription</b>          |                                                                                    |       |          |
| CNAG_02166                    | DNA-directed RNA polymerase II subunit RPB1                                        | 1.23  | 8.74E-09 |
| CNAG_00068                    | Specific RNA polymerase II transcription factor                                    | 1.18  | 5.79E-06 |
| CNAG_06754                    | RNA polymerase-associated protein ( <i>CTR9</i> )                                  | 1.21  | 5.58E-09 |
| CNAG_03940                    | Elongator complex protein 2                                                        | 1.23  | 2.85E-07 |
| CNAG_03603                    | ATP-dependent RNA helicase ( <i>HAS1</i> )                                         | 1.08  | 4.75E-07 |
| CNAG_05360                    | ATP-dependent RNA helicase ( <i>MAK5</i> )                                         | 1.10  | 1.64E-06 |
| CNAG_03205                    | ATP-dependent RNA helicase ( <i>ROK1</i> )                                         | 1.13  | 7.10E-07 |
| CNAG_06670                    | HIV Tat-specific factor 1                                                          | 1.11  | 9.72E-08 |
| CNAG_05830                    | Cytoplasmic protein with putative role in transcription                            | 1.18  | 6.67E-07 |
| CNAG_05782                    | Mortality factor 4-like protein 1                                                  | 1.22  | 2.58E-06 |
| CNAG_00347                    | DEAH box polypeptide 36 (RNA helicase)                                             | -1.33 | 5.85E-08 |
| CNAG_06322                    | Histone acetyltransferase ( <i>SAS3</i> )                                          | 1.10  | 1.24E-06 |
| CNAG_06706                    | Proline-, Glutamic acid- and Leucine-rich protein 1                                | -1.12 | 1.37E-06 |
| <b>Transcription factors</b>  |                                                                                    |       |          |
| CNAG_00156                    | Zinc finger transcription factor ( <i>CRZ1</i> )                                   | 1.18  | 3.86E-07 |
| CNAG_07435                    | CCAAT-binding transcription factor ( <i>HAP2</i> )                                 | 1.29  | 5.39E-09 |
| CNAG_04090                    | Activating transcription factor ( <i>ATF1</i> )                                    | 1.24  | 5.22E-08 |
| CNAG_03902                    | Transcriptional regulatory protein ( <i>RDS2</i> )                                 | 1.20  | 9.36E-10 |
| CNAG_00883                    | Zn2-Cys6 zinc-finger transcription factor ( <i>ECM2201</i> )                       | 1.15  | 6.98E-08 |
| CNAG_01626                    | Predicted saga histone acetyltransferase complex component ( <i>ADA2</i> )         | 1.21  | 1.20E-08 |
| CNAG_05181                    | White-collar transcription factor; blue-light photoresponsive gene ( <i>BWC1</i> ) | 1.10  | 5.60E-08 |

|                                        |                                                           |       |          |
|----------------------------------------|-----------------------------------------------------------|-------|----------|
| CNAG_04774                             | Nuclear protein                                           | 1.14  | 2.98E-06 |
| CNAG_04637                             | Multiprotein bridging factor ( <i>MBF1</i> )              | -1.15 | 1.25E-08 |
| CNAG_05785                             | Putative transcription factor ( <i>STB4</i> )             | -1.20 | 4.72E-06 |
| <b>RNA processing</b>                  |                                                           |       |          |
| CNAG_00086                             | N2.N2-dimethylguanosine tRNA methyltransferase            | 1.13  | 5.17E-09 |
| CNAG_05101                             | U3 small nucleolar RNA-associated protein 12              | 1.14  | 9.78E-07 |
| CNAG_06798                             | U3 small nucleolar RNA-associated protein 18              | 1.10  | 4.31E-07 |
| CNAG_01146                             | U3 small nucleolar RNA-associated protein 22              | 1.19  | 4.02E-06 |
| CNAG_03491                             | Cleavage and polyadenylation specificity factor subunit 5 | 1.31  | 3.86E-07 |
| CNAG_01526                             | Cleavage and polyadenylation specificity factor subunit 4 | 1.15  | 6.45E-07 |
| CNAG_04821                             | PAB-dependent poly(A)-specific ribonuclease subunit PAN3  | 1.23  | 5.37E-08 |
| CNAG_02028                             | CMGC/SRPK protein kinase                                  | 1.18  | 1.39E-11 |
| CNAG_05457                             | Pentatricopeptide repeat protein                          | 1.12  | 5.87E-06 |
| CNAG_00635                             | RNA binding protein                                       | 1.17  | 3.47E-06 |
| CNAG_04028                             | RNA binding protein                                       | -1.21 | 6.88E-07 |
| <b>Spliceosome</b>                     |                                                           |       |          |
| CNAG_01809                             | U4/U6 small nuclear ribonucleoprotein PRP3                | 1.16  | 2.03E-06 |
| CNAG_01091                             | U5 small nuclear ribonucleoprotein component              | 1.17  | 3.14E-07 |
| CNAG_05848                             | Splicing factor U2AF 65 kDa subunit                       | 1.21  | 4.04E-06 |
| <b>RNA degradation</b>                 |                                                           |       |          |
| CNAG_04609                             | Argonaute protein ( <i>AGO1</i> )                         | 1.20  | 2.59E-09 |
| CNAG_02745                             | Dicer ( <i>DCR2</i> )                                     | 1.18  | 1.57E-06 |
| CNAG_03314                             | YTH domain family 2                                       | 1.20  | 1.93E-06 |
| <b>Translation</b>                     |                                                           |       |          |
| CNAG_03606                             | Translation initiation factor aIF-2                       | 1.14  | 8.07E-07 |
| CNAG_02507                             | Translation initiation factor 3 subunit H                 | 1.14  | 1.15E-06 |
| CNAG_00238                             | Isoleucine-tRNA ligase                                    | 1.16  | 9.25E-07 |
| CNAG_04800                             | Phenylalanine-tRNA ligase. alpha subunit                  | 1.13  | 3.72E-08 |
| CNAG_06755                             | Threonine-tRNA ligase                                     | 1.21  | 2.19E-07 |
| CNAG_03792                             | tRNA adenylyltransferase                                  | 1.11  | 1.11E-06 |
| CNAG_00292                             | Zinc finger protein ( <i>ZRP1</i> )                       | -1.37 | 4.74E-08 |
| <b>PROTEINS PROCESSING</b>             |                                                           |       |          |
| <b>Post-translational modification</b> |                                                           |       |          |
| CNAG_01592                             | Protein-S-isoprenylcysteine O-methyltransferase           | 1.20  | 5.80E-10 |
| CNAG_07780                             | Geranylgeranyl diphosphate synthase                       | -1.18 | 1.59E-06 |
| CNAG_01520                             | Histone-arginine methyltransferase CARM1                  | -1.32 | 3.05E-08 |
| CNAG_06221                             | Peptidyl-diphthamide biosynthesis protein 2               | -1.15 | 7.17E-06 |
| <b>Protein folding</b>                 |                                                           |       |          |

|            |                                  |       |          |
|------------|----------------------------------|-------|----------|
| CNAG_02500 | Calnexin                         | -1.26 | 1.28E-06 |
| CNAG_00447 | T-complex protein 1 subunit beta | -1.30 | 1.67E-06 |
| CNAG_04304 | T-complex protein 1 subunit zeta | -1.11 | 9.26E-07 |
| CNAG_06240 | Protein disulfide-isomerase      | -1.22 | 2.28E-06 |

## **STRUCTURE**

### **Membrane**

|            |                                                       |       |               |
|------------|-------------------------------------------------------|-------|---------------|
| CNAG_02415 | Annexin XIV                                           | 1.18  | 4.69E-09      |
| CNAG_02268 | Nuclear membrane protein                              | 1.09  | 1.72E-06      |
| CNAG_04453 | Inositol-phosphoryl ceramide synthase ( <i>IPC1</i> ) | 1.17  | 5.79E-06      |
| CNAG_06543 | Ethanolaminephosphotransferase                        | 1.06  | 6.94E-06      |
| CNAG_00388 | 1-phosphatidylinositol-4-phosphate 5-kinase           | 1.15  | 6.43E-06      |
| CNAG_05083 | Esterase/lipase                                       | 1.11  | 3.78E-09      |
| CNAG_07544 | Sterol esterase                                       | 1.09  | 8.95E-09      |
| CNAG_05266 | Membrane protein                                      | -1.20 | 5.88E-09      |
| CNAG_00923 | Membrane protein                                      | -1.15 | 7.23E-08      |
| CNAG_03991 | Integral membrane protein                             |       | 1.34 1.29E-11 |
| CNAG_01711 | Glycerol-3-phosphate O-acyltransferase                |       | 1.05 1.37E-06 |

### **Cell wall**

|            |                                                    |       |          |
|------------|----------------------------------------------------|-------|----------|
| CNAG_03234 | Cell wall surface anchor protein                   | 1.48  | 9.81E-10 |
| CNAG_02871 | GPI mannosyltransferase 2                          | 1.09  | 2.48E-06 |
| CNAG_05080 | Calcofluor white hypersensitive protein            | 1.16  | 6.55E-07 |
| CNAG_06487 | Putative chitin synthase ( <i>CHS6</i> )           | 1.14  | 1.30E-07 |
| CNAG_06678 | Putative chitin synthase regulator ( <i>CSR1</i> ) | 1.15  | 5.60E-06 |
| CNAG_07499 | Putative chitin synthase ( <i>CHS8</i> )           | 1.12  | 9.00E-09 |
| CNAG_05818 | Putative chitin synthase ( <i>CHS5</i> )           | -1.15 | 2.19E-06 |
| CNAG_04245 | Endochitinase ( <i>CHI22</i> )                     | 1.31  | 2.17E-10 |

### **Capsule**

|            |                                                |      |                |
|------------|------------------------------------------------|------|----------------|
| CNAG_00746 | Capsular associated protein ( <i>CAS35</i> )   | 1.12 | 2.90E-08       |
| CNAG_00721 | Alpha-1.3-mannosyltransferase ( <i>CAP59</i> ) | 1.21 | 2.92E-06       |
| CNAG_02885 | Capsule-associated protein ( <i>CAP64</i> )    | 1.12 | 6.11E-07       |
| CNAG_07554 | Capsule-associated protein ( <i>CAP10</i> )    | 1.18 | 2.62E-07       |
| CNAG_01341 | Mannose-6-phosphate isomerase ( <i>MAN1</i> )  |      | -1.13 3.50E-06 |

## **STRESS RESPONSE**

### **Chaperon & Heat shock proteins**

|            |                     |       |          |
|------------|---------------------|-------|----------|
| CNAG_01696 | Chaperone DnaJ      | -1.52 | 8.28E-12 |
| CNAG_00305 | Chaperone activator | -1.42 | 3.59E-09 |
| CNAG_03944 | Chaperone regulator | -1.40 | 3.52E-09 |
| CNAG_01185 | Hsp70-like protein  | -1.47 | 1.02E-09 |
| CNAG_01347 | Co-chaperone        | -1.14 | 1.77E-07 |



|                         |                                                                          |       |          |
|-------------------------|--------------------------------------------------------------------------|-------|----------|
| CNAG_06443              | Putative ATPase and ER protein chaperone similar to Kar2 ( <i>SSA1</i> ) | -1.59 | 3.20E-08 |
| CNAG_06106              | Chaperone regulator                                                      | -1.57 | 2.88E-09 |
| CNAG_00287              | Cytoplasmic protein putative Hsc70 co-chaperone                          | -1.34 | 1.41E-09 |
| <b>Iron homeostasis</b> |                                                                          |       |          |
| CNAG_06524              | Ferric reductase ( <i>FRE3</i> )                                         | 1.09  | 4.92E-06 |
| CNAG_04202              | Cytosolic Fe-S cluster assembly factor ( <i>NAR1</i> )                   | 1.14  | 4.62E-06 |
| CNAG_02959              | Iron permease ( <i>CFT2</i> )                                            | 1.21  | 1.77E-10 |
| CNAG_04314              | NAD+ kinase (associated with ferric reductase activity)                  | 1.14  | 4.46E-06 |
| CNAG_03465              | Laccase 1 ( <i>LAC1</i> )                                                | -1.36 | 1.59E-06 |
| CNAG_03464              | Laccase 2 ( <i>LAC2</i> )                                                | -1.23 | 4.10E-07 |
| CNAG_06242              | Major iron permease ( <i>CFT1</i> )                                      | -1.25 | 5.31E-09 |
| <b>Proteasome</b>       |                                                                          |       |          |
| CNAG_00062              | 26S proteasome regulatory subunit N3                                     | 1.24  | 7.65E-07 |
| CNAG_02395              | Ubiquitin carboxyl-terminal hydrolase 9/13                               | 1.19  | 1.46E-09 |
| CNAG_00426              | UBA/TS-N domain-containing protein                                       | 1.29  | 6.02E-06 |
| CNAG_02568              | UBA/TS-N domain-containing protein                                       | 1.21  | 5.57E-06 |
| CNAG_01732              | Nuclear protein localization protein 4                                   | 1.15  | 1.18E-06 |
| CNAG_03039              | DNA damage-inducible protein 1                                           | -1.21 | 3.41E-06 |
| CNAG_04328              | Ubiquitin-conjugating enzyme E2 I                                        | -1.12 | 7.03E-07 |
| CNAG_03598              | Ubiquilin                                                                | -1.36 | 3.48E-07 |
| CNAG_03816              | 20S proteasome subunit beta 1                                            | -1.11 | 2.62E-06 |
| CNAG_04071              | 20S proteasome subunit alpha 6                                           | -1.16 | 3.99E-07 |
| CNAG_02239              | 26S protease regulatory subunit 4                                        | -1.42 | 4.13E-07 |
| CNAG_00046              | 26S proteasome regulatory subunit N8                                     | -1.31 | 7.58E-09 |
| CNAG_01746              | E3 ubiquitin-protein ligase RNF14                                        | -1.10 | 9.30E-08 |
| CNAG_01920              | Ubiquitin precursor ( <i>UBI4</i> )                                      | -1.09 | 1.13E-06 |
| CNAG_06402              | 26S proteasome complex subunit DSS1                                      | -1.08 | 5.23E-06 |
| CNAG_02214              | Ubiquitin conjugating enzyme ( <i>UBC6-2</i> )                           | -1.08 | 3.02E-06 |
| <b>ENZYMES</b>          |                                                                          |       |          |
| <b>Oxidoreductases</b>  |                                                                          |       |          |
| CNAG_06081              | Glucose oxidase                                                          | 1.22  | 4.04E-06 |
| CNAG_01540              | Dehydrogenase                                                            | 1.14  | 1.88E-06 |
| CNAG_03865              | Putative oxidoreductase                                                  | 1.12  | 9.91E-07 |
| CNAG_05114              | Peroxisomal copper amine oxidase                                         | 1.17  | 4.41E-09 |
| CNAG_01794              | 2-hydroxyacid dehydrogenase                                              | 1.13  | 1.83E-06 |
| CNAG_05723              | Alcohol dehydrogenase                                                    | 1.10  | 1.53E-06 |
| CNAG_00735              | Aldehyde dehydrogenase family 7 member A1                                | 1.17  | 4.31E-09 |
| CNAG_04467              | Succinate-semialdehyde dehydrogenase (NADP+)                             | 1.11  | 6.83E-09 |

|                     |                                                                |       |          |
|---------------------|----------------------------------------------------------------|-------|----------|
|                     | ( <i>UGA2</i> )                                                |       |          |
| CNAG_07626          | NAD-binding Rossmann fold oxidoreductase                       | 1.28  | 6.07E-13 |
| CNAG_04657          | Short chain dehydrogenase                                      | 1.25  | 4.21E-11 |
| CNAG_05299          | Oxidoreductase                                                 | -1.35 | 9.55E-07 |
| CNAG_03176          | Endoplasmic oxidoreductin 1                                    | -1.42 | 3.55E-08 |
| CNAG_05115          | Sarcosine oxidase                                              | -1.19 | 5.13E-06 |
| CNAG_07491          | Glutaredoxin                                                   | -1.12 | 4.85E-06 |
| CNAG_04981          | Catalase 1 similar to spore-specific catalases ( <i>CAT1</i> ) | -1.53 | 5.90E-06 |
| CNAG_01605          | Rossmann fold oxidoreductase                                   | 1.08  | 4.13E-06 |
| CNAG_00984          | Glucose and ribitol dehydrogenase                              | 1.24  | 3.80E-06 |
| CNAG_03199          | FAD dependent oxidoreductase                                   | 1.10  | 6.32E-06 |
| CNAG_00542          | Salicylate hydroxylase                                         | -1.15 | 3.94E-07 |
| CNAG_02553          | Short-chain dehydrogenase                                      | -1.20 | 1.94E-08 |
| CNAG_01464          | Flavo-hemoglobin ( <i>FHB1</i> )                               | -1.16 | 6.36E-06 |
| CNAG_01949          | Chlorophyll synthesis pathway protein BchC                     | -1.13 | 1.88E-08 |
| CNAG_06672          | Formate dehydrogenase                                          | -1.23 | 7.85E-10 |
| <b>Transferases</b> |                                                                |       |          |
| CNAG_04860          | Xylosylphosphotransferase ( <i>XPT1</i> )                      | 1.22  | 7.04E-06 |
| CNAG_04195          | O-methyltransferase                                            | 1.12  | 8.73E-07 |
| <b>Hydrolases</b>   |                                                                |       |          |
| CNAG_04869          | Para-nitrobenzyl esterase ( <i>PNB1</i> )                      | 1.26  | 1.71E-06 |
| CNAG_04104          | Mucin-desulfating sulfatase                                    | 1.19  | 5.16E-11 |
| CNAG_01744          | Phosphatase                                                    | 1.13  | 7.02E-07 |
| CNAG_06601          | Amidohydrolase                                                 | 1.16  | 6.79E-06 |
| CNAG_01072          | Amidase                                                        | 1.32  | 6.86E-08 |
| CNAG_02980          | Membrane dipeptidase                                           | 1.18  | 1.84E-08 |
| CNAG_06640          | Cathepsin A (carboxypeptidase C)                               | 1.17  | 6.56E-06 |
| CNAG_01879          | Cathepsin A (carboxypeptidase C)                               | 1.12  | 5.73E-07 |
| CNAG_00919          | Carboxypeptidase D                                             | 1.16  | 1.58E-06 |
| CNAG_01266          | ATP-dependent protease La                                      | 1.16  | 3.51E-06 |
| CNAG_04269          | Leucyl aminopeptidase                                          | 1.22  | 1.32E-10 |
| CNAG_07520          | Endopeptidase                                                  | 1.20  | 3.62E-10 |
| CNAG_00150          | Peptidase                                                      | 1.28  | 1.05E-07 |
| CNAG_04619          | Prolyl oligopeptidase                                          | 1.18  | 2.41E-06 |
| CNAG_00098          | Palmitoyl-protein thioesterase                                 | 1.22  | 2.23E-08 |
| CNAG_04735          | Metalloproteinase ( <i>MEP1</i> )                              | -1.12 | 2.17E-06 |
| CNAG_06482          | Amidase                                                        | -1.15 | 1.97E-06 |
| <b>OTHER</b>        |                                                                |       |          |
| CNAG_02588          | Avenacinase                                                    | 1.14  | 5.10E-08 |
| CNAG_07422          | Delayed-type hypersensitivity antigen ( <i>DHA1</i> )          | 1.17  | 8.77E-07 |

|            |                                              |       |          |
|------------|----------------------------------------------|-------|----------|
| CNAG_04253 | Transmembrane protein                        | 1.17  | 7.13E-08 |
| CNAG_04403 | CCCH zinc finger protein                     | 1.17  | 2.38E-06 |
| CNAG_05707 | Cytoplasmic protein                          | 1.09  | 3.57E-08 |
| CNAG_01015 | Cytoplasmic protein                          | 1.60  | 3.39E-09 |
| CNAG_03621 | Cyclophilin A ( <i>CPA2</i> )                | -1.21 | 9.13E-08 |
| CNAG_06220 | Allergen                                     | -1.20 | 5.42E-13 |
| CNAG_01763 | Cytoplasmic protein                          | -1.19 | 1.27E-10 |
| CNAG_06383 | Cytoplasmic protein                          | -1.12 | 2.80E-06 |
| CNAG_02473 | Endoplasmic reticulum protein                | -1.10 | 7.16E-07 |
| CNAG_03012 | Quorum sensing-like molecule ( <i>CQS1</i> ) | -1.31 | 4.53E-08 |

## **MITOCHONDRIA FUNCTIONS**

### **CELLULAR RESPIRATION**

#### **Oxidative decarboxylation of pyruvate**

|            |                                                  |      |          |
|------------|--------------------------------------------------|------|----------|
| CNAG_03509 | Pyruvate dehydrogenase protein X component       | 1.18 | 7.61E-09 |
| CNAG_05059 | Pyruvate dehydrogenase E1 component subunit beta | 1.16 | 8.88E-07 |
| CNAG_04108 | Pyruvate dehydrogenase kinase                    | 1.25 | 6.98E-06 |

#### **TCA Cycle**

|            |                                                   |      |          |
|------------|---------------------------------------------------|------|----------|
| CNAG_05653 | Malate synthase ( <i>MLS1</i> )                   | 1.19 | 1.10E-06 |
| CNAG_00061 | Citrate synthase ( <i>CIT1</i> )                  | 1.12 | 1.38E-06 |
| CNAG_01137 | Mitochondrial aconitase hydratase ( <i>ACO1</i> ) | 1.22 | 4.01E-07 |
| CNAG_03427 | Aconitase hydratase ( <i>ACO4</i> )               | 1.16 | 1.64E-06 |

#### **Respiratory chain proteins**

|            |                                                       |       |          |
|------------|-------------------------------------------------------|-------|----------|
| CNAG_02792 | Mitochondrial BCS1 respiratory chain                  | 1.13  | 1.27E-07 |
| CNAG_04529 | Cytochrome c oxidase-assembly factor ( <i>COX16</i> ) | 1.15  | 2.84E-07 |
| CNAG_02609 | 3-demethylubiquinone-9 3-O-methyltransferase          | 1.14  | 3.52E-06 |
| CNAG_04264 | Ubiquinone biosynthesis monooxygenase ( <i>COQ6</i> ) | 1.16  | 1.08E-09 |
| CNAG_03618 | Quinone reductase (NADPH2)                            | -1.22 | 5.19E-06 |
| CNAG_00462 | Electron-transferring-flavoprotein dehydrogenase      | 1.22  | 3.17E-09 |

### **TRANSPORT**

|            |                                                                               |      |          |
|------------|-------------------------------------------------------------------------------|------|----------|
| CNAG_01529 | Mitochondrial phosphate transporter. member 23/24/25/41                       | 1.24 | 1.87E-09 |
| CNAG_05283 | Mitochondrial carrier protein. member 16                                      | 1.13 | 1.59E-07 |
| CNAG_02917 | Mitochondrial solute carrier protein ( <i>YHM1</i> )                          | 1.17 | 1.45E-06 |
| CNAG_01752 | Mitochondrial 2-oxodicarboxylate transporter. member 21                       | 1.14 | 1.27E-09 |
| CNAG_03452 | AFG1 family mitochondrial ATPase                                              | 1.20 | 1.89E-07 |
| CNAG_03512 | Putative mitochondrial K <sup>+</sup> /H <sup>+</sup> exchanger (KHE) protein | 1.17 | 4.24E-07 |
| CNAG_05150 | ATP-binding cassette (ABC) transporter. mitochondrial precursor               | 1.11 | 2.65E-08 |

|                                     |                                                       |       |          |
|-------------------------------------|-------------------------------------------------------|-------|----------|
| CNAG_05300                          | Mitochondrial carrier protein                         | -1.23 | 4.36E-06 |
| <b><u>MTOCHONDRIAL PROTEINS</u></b> |                                                       |       |          |
| CNAG_02131                          | Iron-sulfur cluster assembly protein ( <i>ISA1</i> )  | 1.12  | 5.59E-06 |
| CNAG_05194                          | Lipoyl acid synthase                                  | 1.20  | 2.15E-06 |
| CNAG_06316                          | Glycine cleavage system H protein                     | 1.09  | 2.89E-06 |
| CNAG_01594                          | Glycine cleavage system P protein                     | 1.40  | 5.39E-12 |
| CNAG_02793                          | Kynurenine 3-monooxygenase                            | 1.10  | 2.37E-06 |
| CNAG_01846                          | Flavoprotein                                          | -1.34 | 5.67E-06 |
| CNAG_02976                          | Riboflavin kinase                                     | -1.14 | 4.95E-06 |
| CNAG_02488                          | Methionyl-tRNA formyltransferase                      | 1.16  | 3.77E-06 |
| CNAG_06446                          | Mitochondrial splicing suppressor                     | 1.35  | 1.01E-09 |
| CNAG_01906                          | Mitochondrial distribution and morphology protein 12  | 1.16  | 2.15E-08 |
| CNAG_07810                          | Mitochondrion protein                                 | 1.22  | 1.75E-07 |
| CNAG_03507                          | Mitochondrial processing peptidase beta subunit       | 1.21  | 4.38E-06 |
| CNAG_04017                          | Protein-methionine-R-oxide reductase ( <i>MXR2</i> )  | -1.19 | 2.10E-07 |
| CNAG_05932                          | Peptidyl-prolyl cis-trans isomerase D (Cyclophilin D) | -1.52 | 1.45E-09 |
| CNAG_00371                          | Methylglutaconyl-CoA hydratase                        | -1.08 | 5.66E-07 |
| CNAG_02049                          | Proline oxidase ( <i>PUT1</i> )                       | -1.24 | 1.25E-07 |

P values were determined using an Adaptive Holm multiple testing correction.
